# Supplementary material for: Design and Synthesis of D3R Bitopic Ligands with Flexible Secondary Binding Fragments: Radioligand Binding and Computational Chemistry Studies
Source: MDPI journal article supplement (doi:10.3390/molecules29010123), 2023-12-24

**Supplementary Materials**

**Design and Synthesis of D<sub>3</sub>R Bitopic Ligands with Flexible Secondary Binding Fragments: Radioligand Binding and Computational Chemistry Studies**

**Gui-Long Tian<sup>1</sup>, Chia-Ju Hsieh<sup>1</sup>, Michelle Taylor<sup>2</sup>, Ji Youn Lee<sup>1</sup>, Robert R. Luedtke<sup>2</sup> and Robert H. Mach<sup>1</sup>**

<sup>1</sup> Division of Nuclear Medicine and Clinical Molecular Imaging, Department of Radiology, Perelman School of Medicine, University of Pennsylvania, Philadelphia, PA 19104, USA

<sup>2</sup> Department of Pharmacology and Neuroscience, University of North Texas Health Science Center-Fort Worth, Texas, TX 76107, USA

\* Correspondence: rmach@pennmedicine.upenn.edu

**Compounds purity and graphs.**

| Compounds       | Structure | Purity |
|-----------------|-----------|--------|
| (R, S)-trans-2a |           | 99.99  |
| (R, S)-trans-2b |           | 99.99  |
| (R, S)-trans-2c |           | 95.19  |
| (R, S)-trans-2d |           | 99.99  |
| (R, S)-trans-2e |           | 98.55  |
| (R, S)-trans-2f |           | 97.72  |
| (R, S)-trans-2g |           | 95.34  |
| (R, S)-trans-2h |           | 97.02  |
| (R, S)-trans-2i |           | 97.70  |
| (R, S)-trans-2j |           | 99.99  |
| (S, R)-trans-2d |           | 96.48  |
| (S, S)-cis-2d   |           | 96.06  |
| (R, R)-cis-2d   |           | 99.99  |

|                        |  |       |
|------------------------|--|-------|
| <b>(S, R)-trans-2i</b> |  | 97.68 |
| <b>(S, S)-cis-2i</b>   |  | 96.06 |
| <b>(R, R)-cis-2i</b>   |  | 99.99 |

**(R, S)-trans-2a GT-1-122**

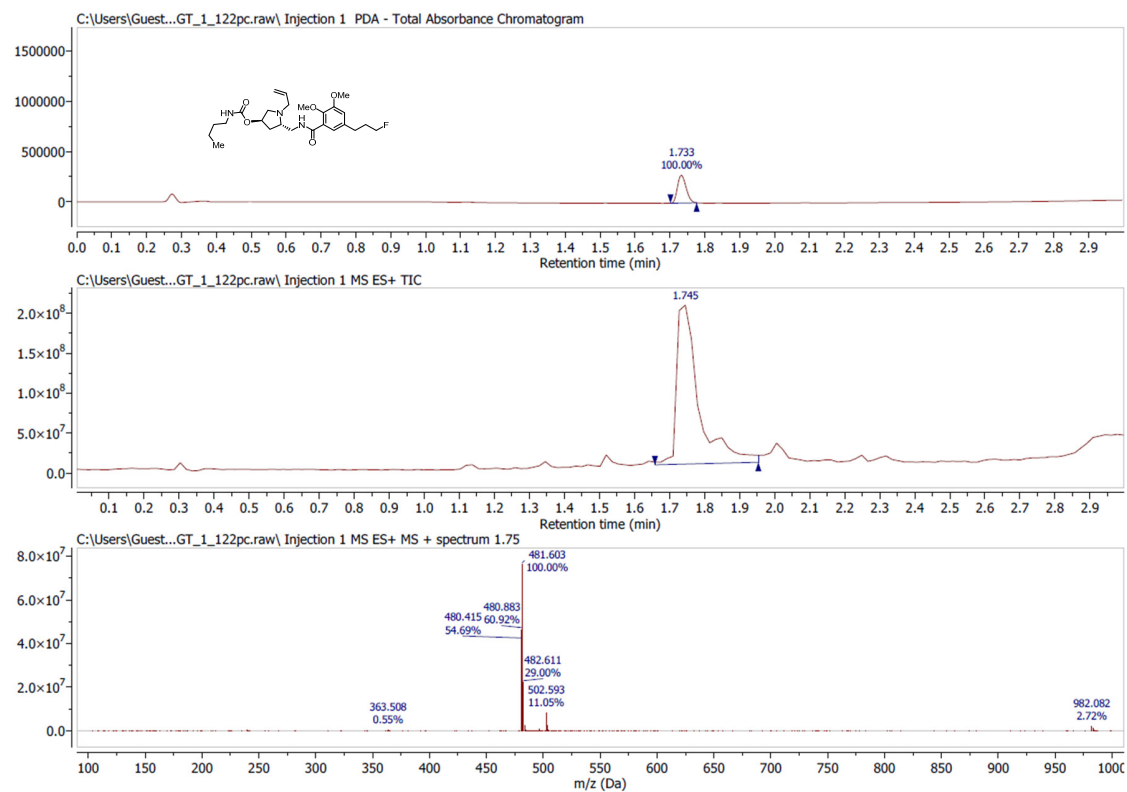

**(R, S)-trans-2b GT-6-122**

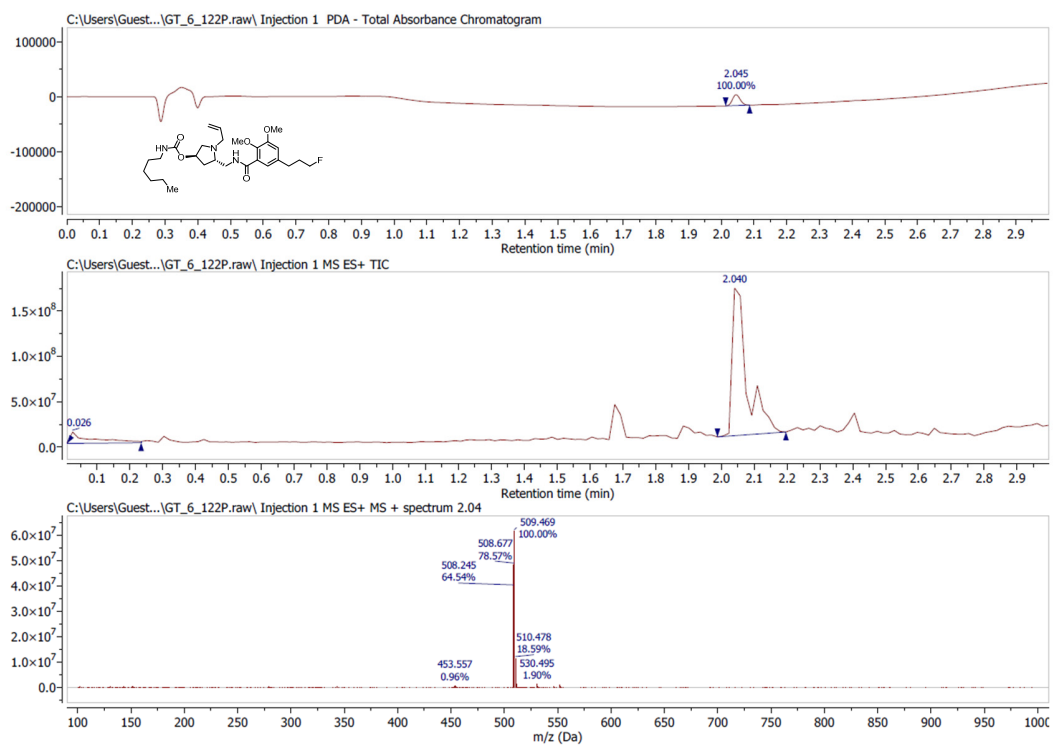



**(R, S)-trans-2c GT-6-146**

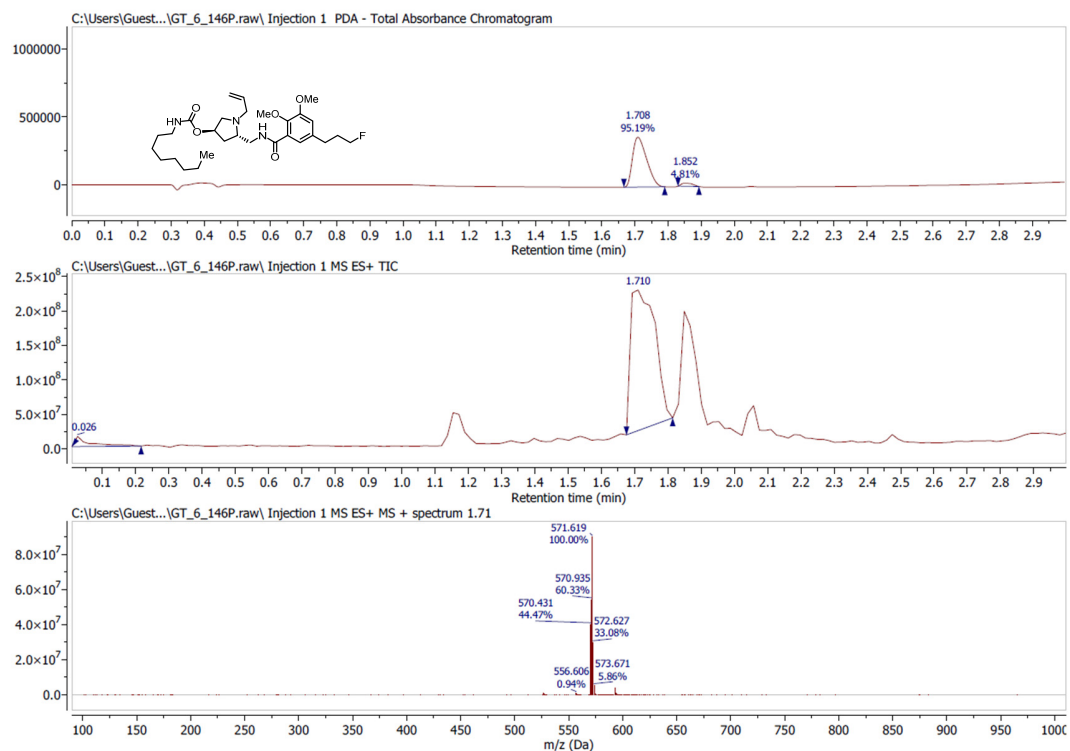

**(R, S)-trans-2d GT-6-123**

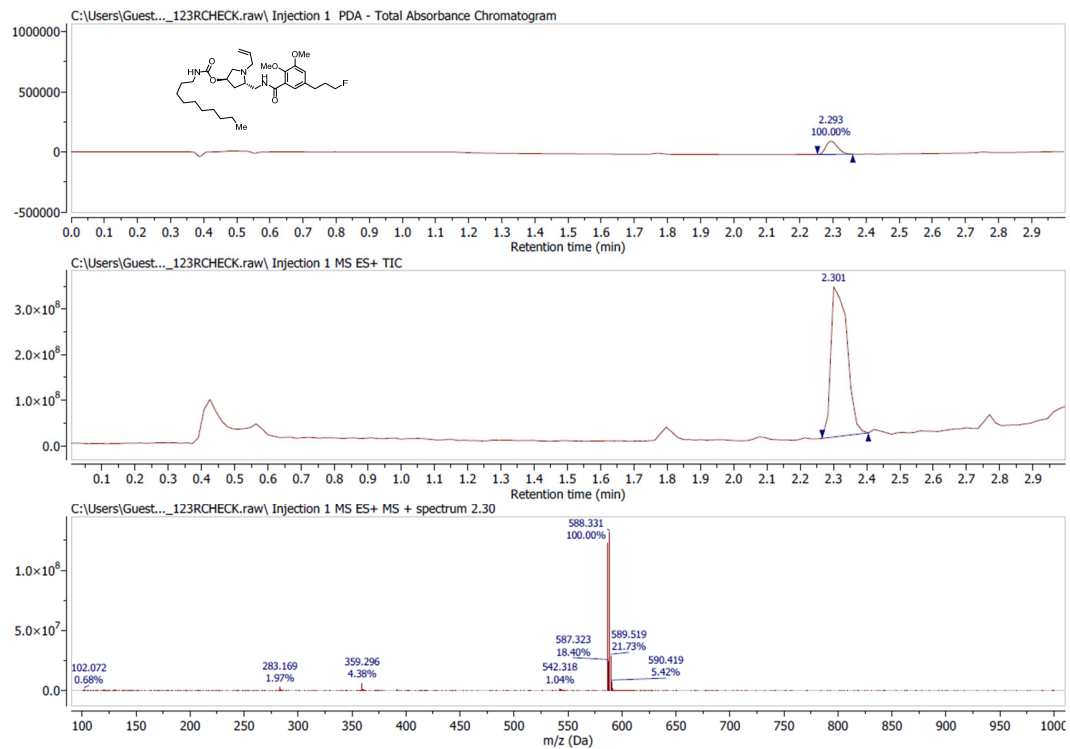

**(R, S)-trans-2e GT-6-147**

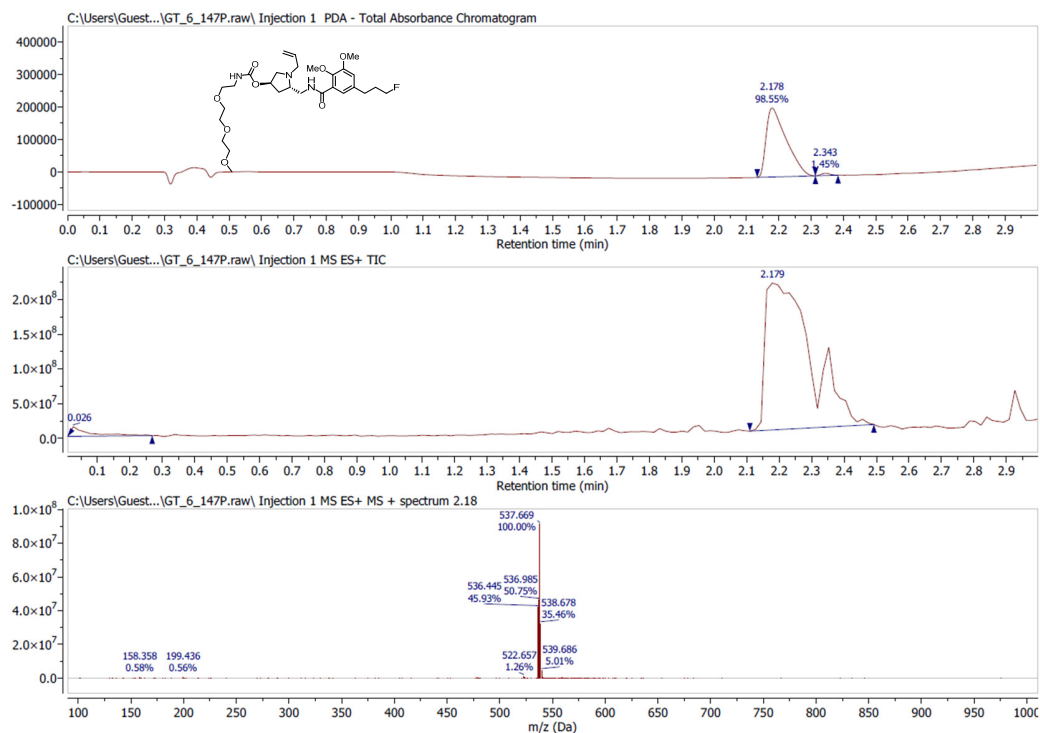

**(R, S)-trans-2f GT-6-142**

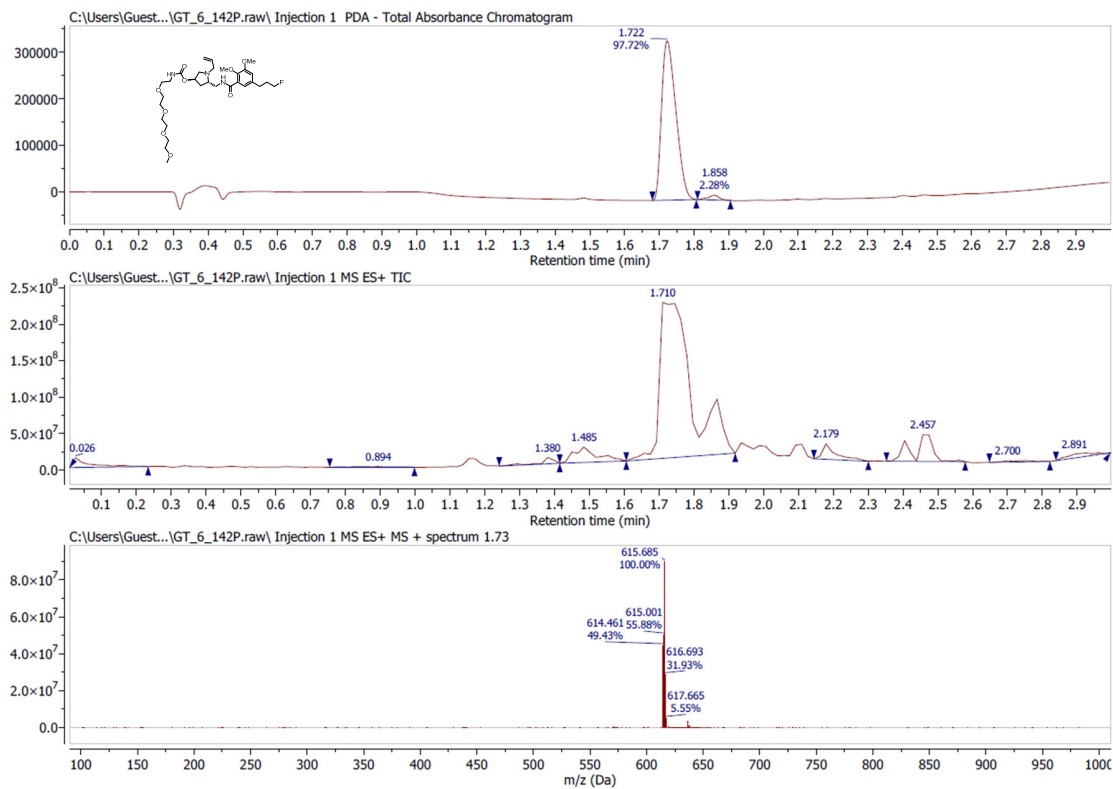

**(R, S)-trans-2g GT-6-148**

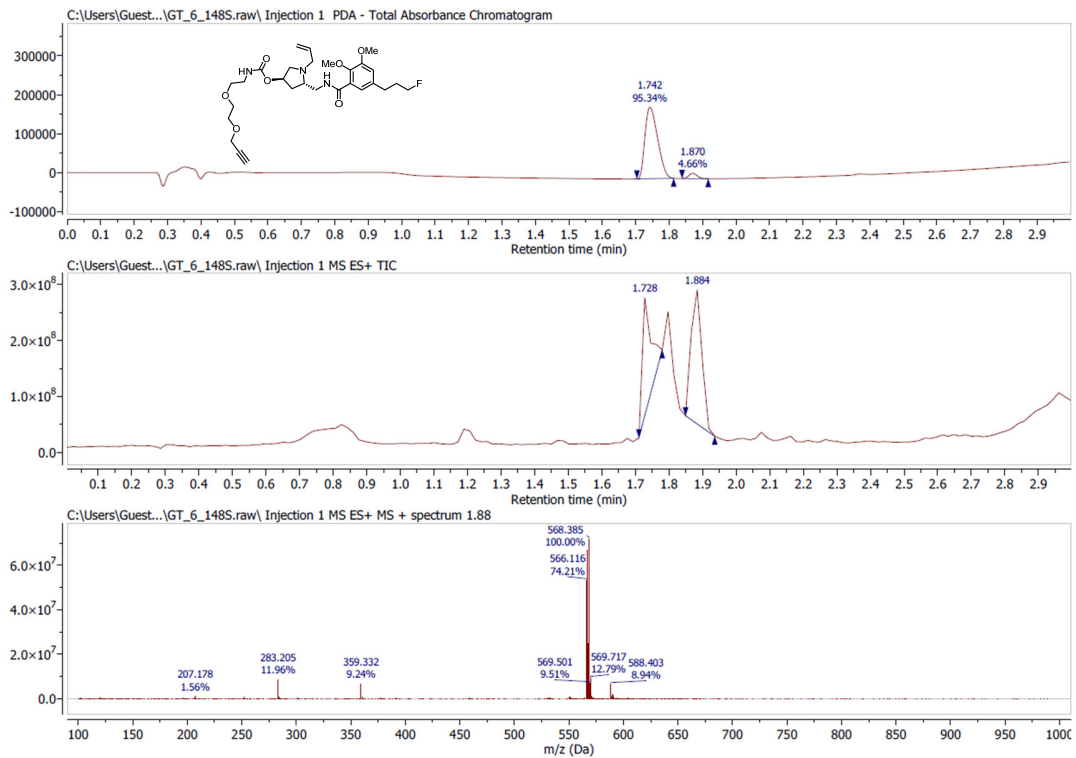

**(R, S)-trans-2h GT-7-6**

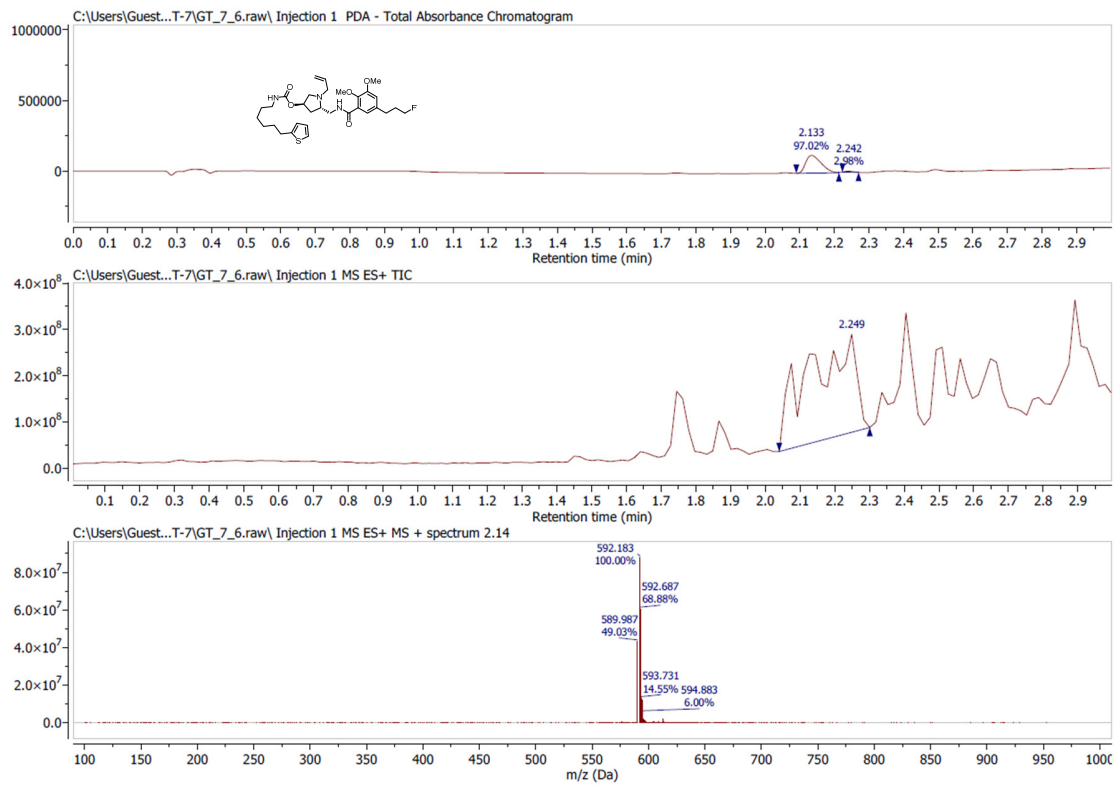

**(R, S)-trans-2i GT-7-12**

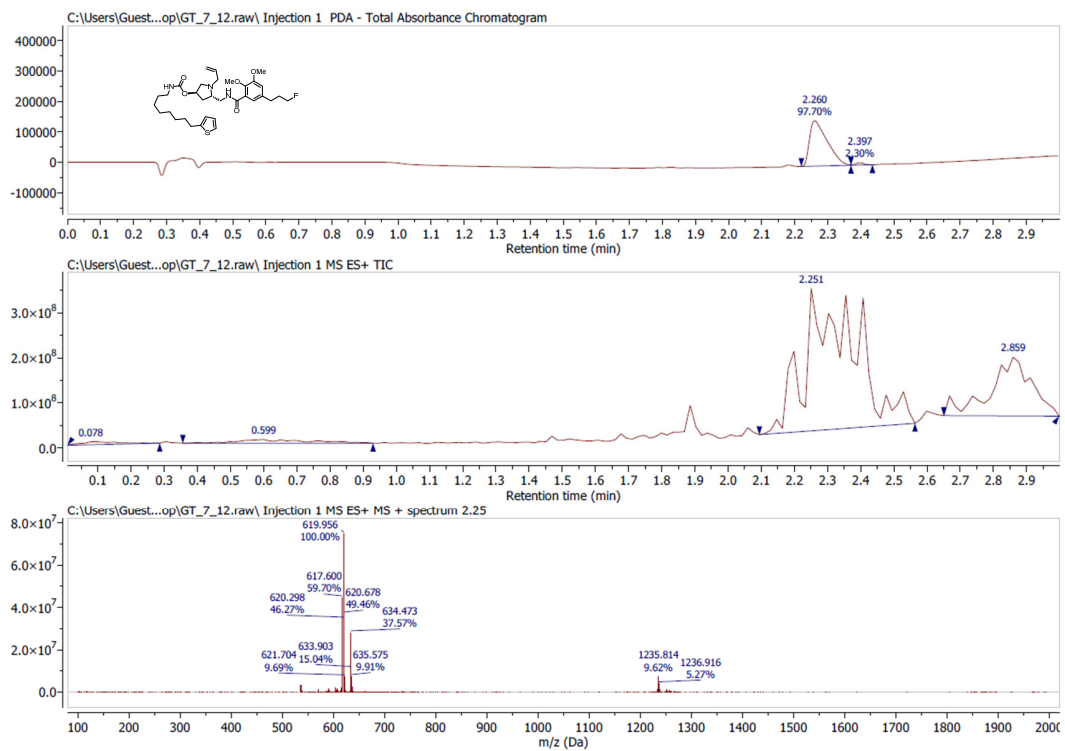

**(R, S)-trans-2j GT-7-15**

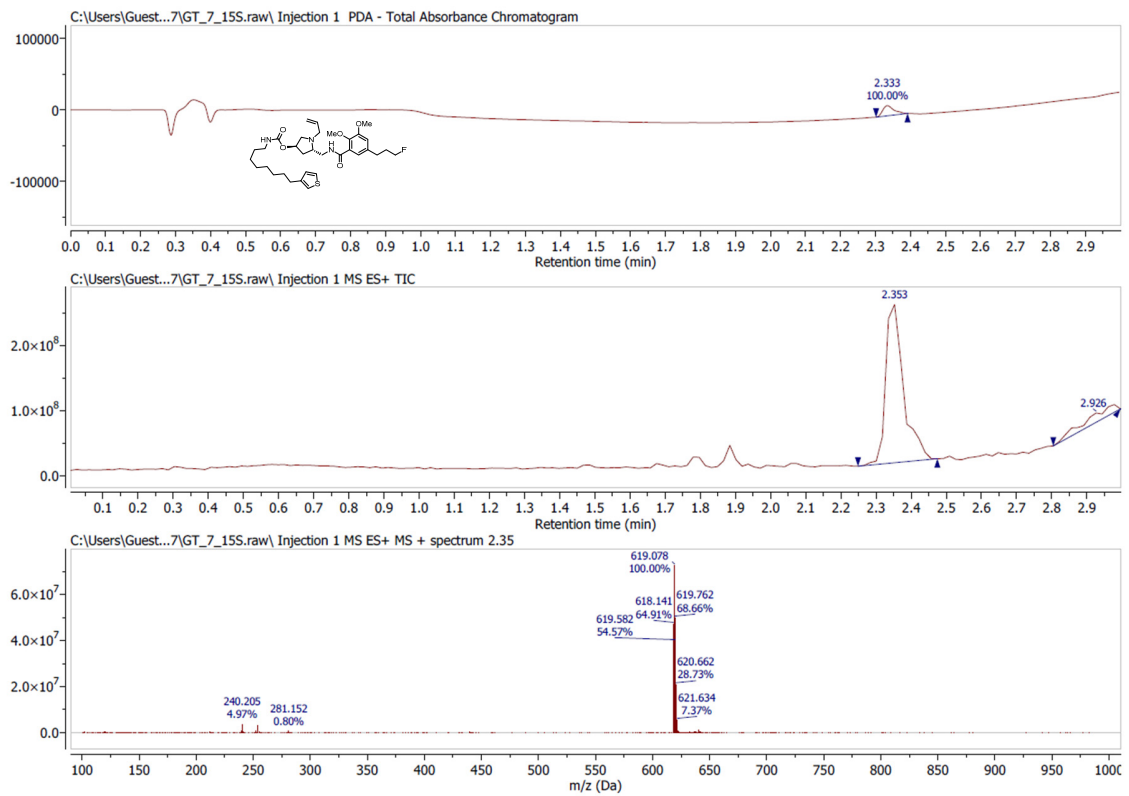

### (S, R)-trans-2d GT-7-50

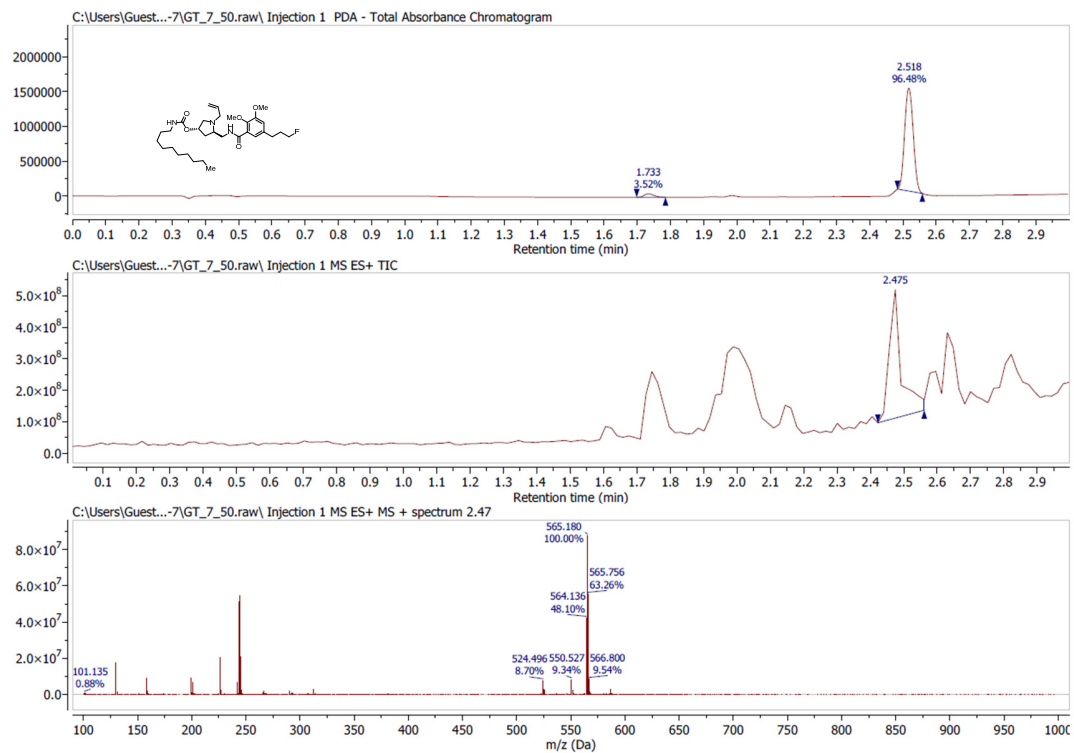

### (S, S)-cis-2d GT-7-52

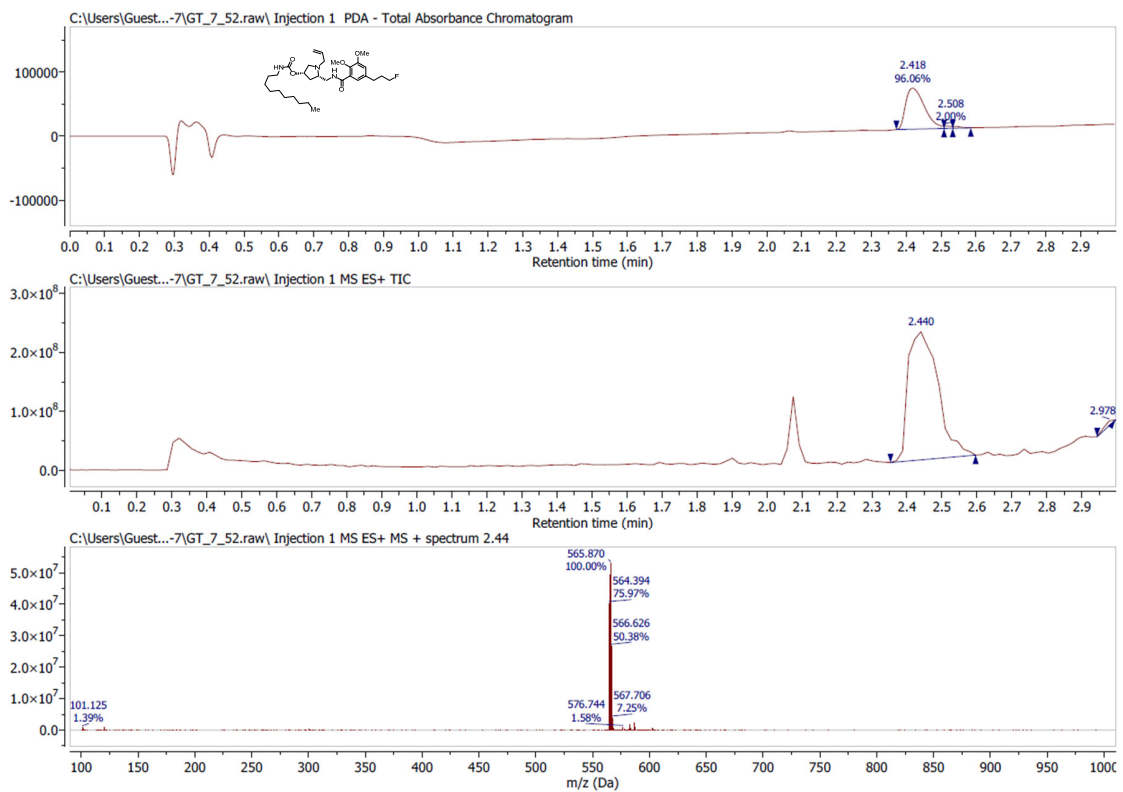

**(R, R)-cis-2d GT-7-54**

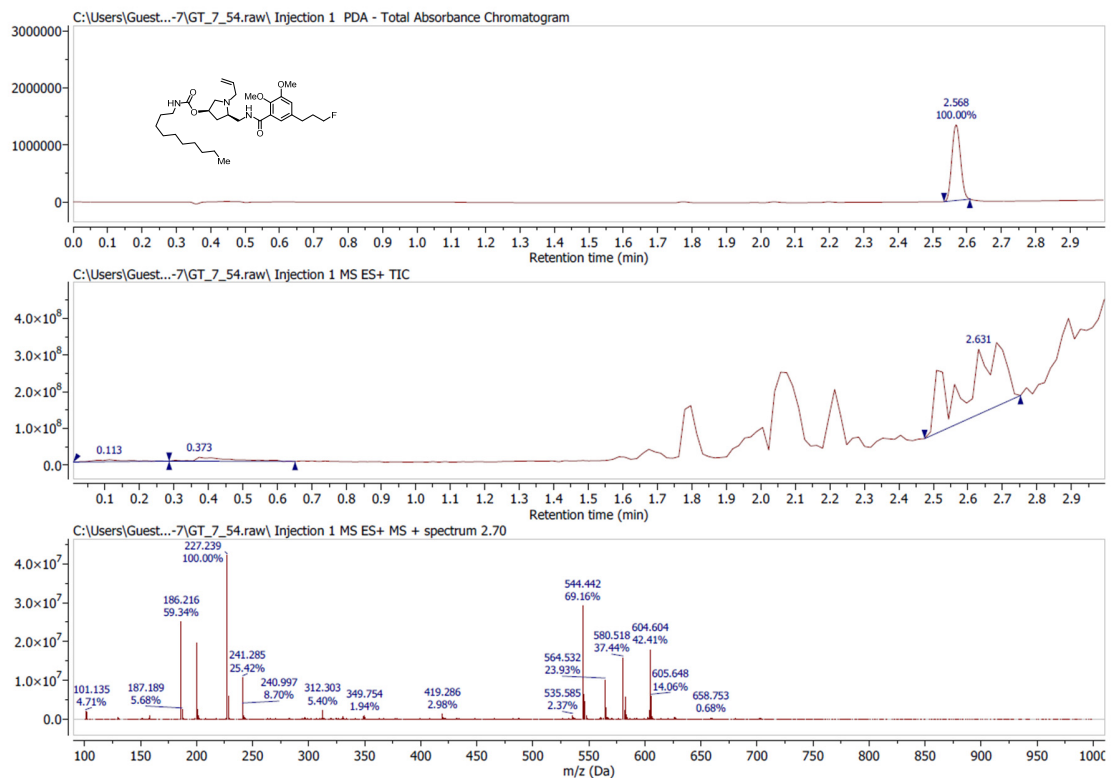

**(S, R)-trans-2i GT-7-51**

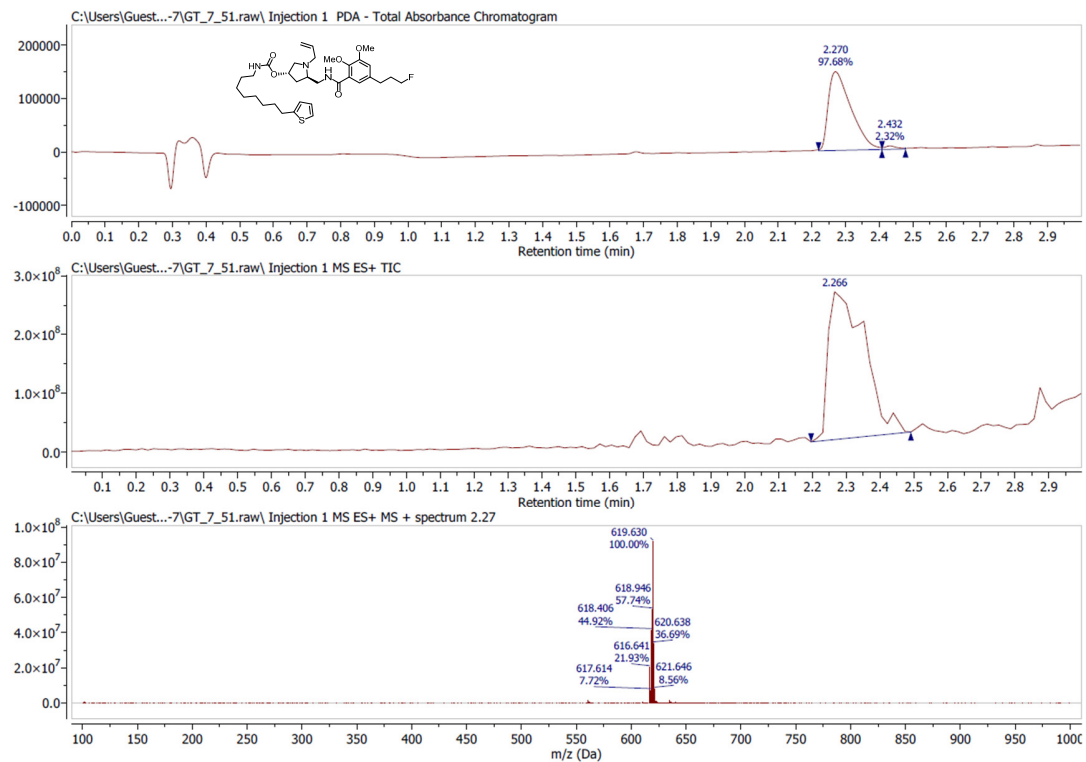

### (S, S)-cis-2i GT-7-53

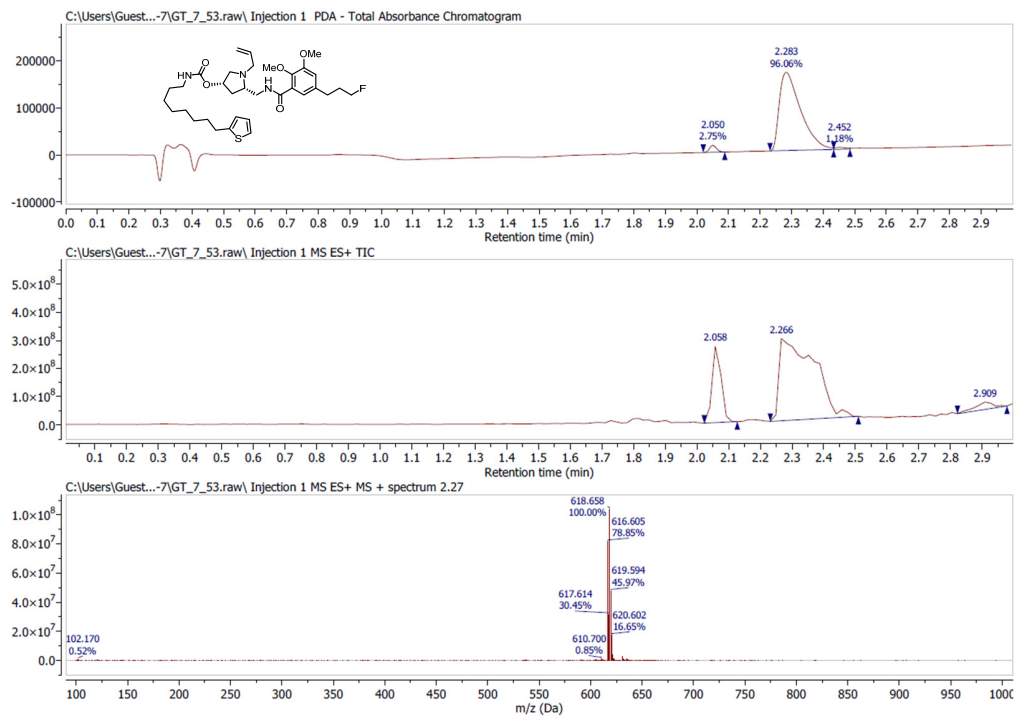

### (R, R)-cis-2i GT-7-55

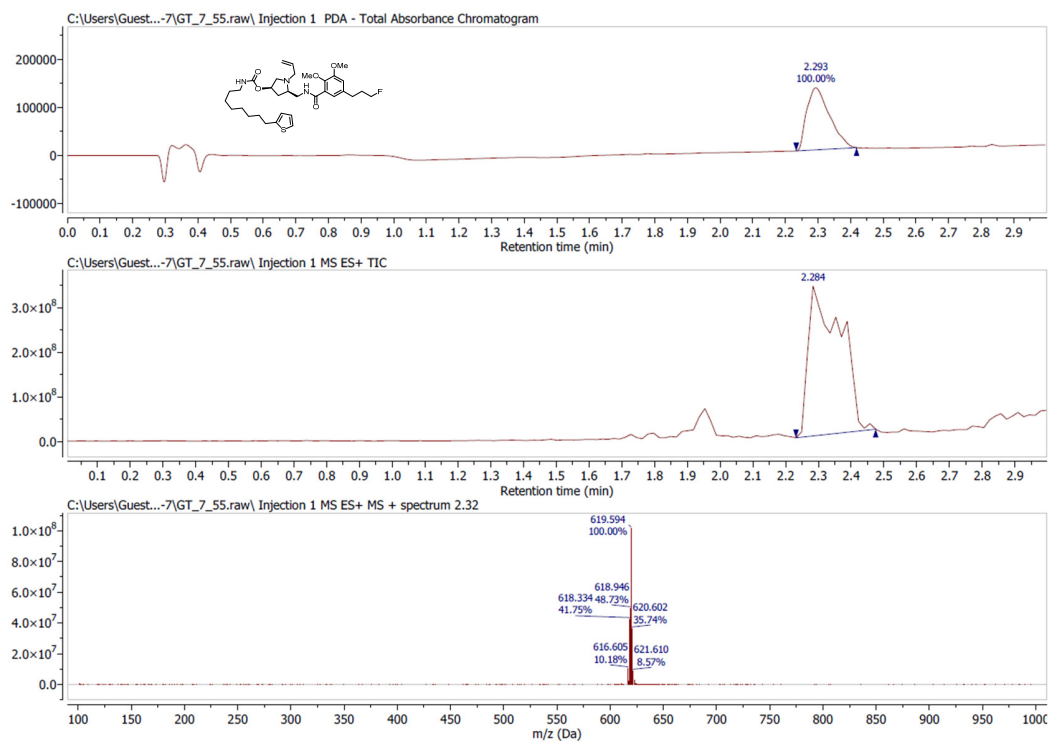

# $^1\text{H}$ and $^{13}\text{C}$ NMR Spectrum

(3*R*,5*S*)-1-allyl-5-((5-(3-fluoropropyl)-2,3-dimethoxybenzamido)methyl)pyrrolidin-3-yl butylcarbamate ((*R,S*)-*trans*-**2a**). *GT-1-122*

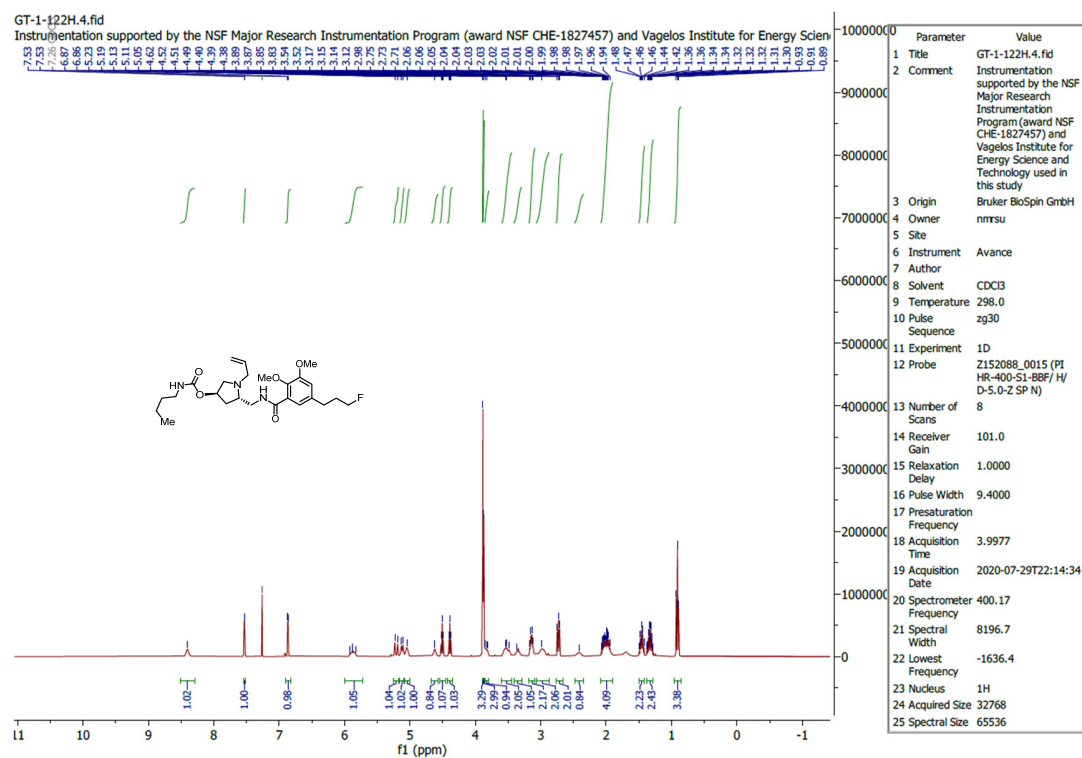



GT-1\_122C.5.fid

Instrumentation supported by the NSF Major Research Instrumentation Program (award NSF CHE-1827457) and Vagelos Institute for Energy Science

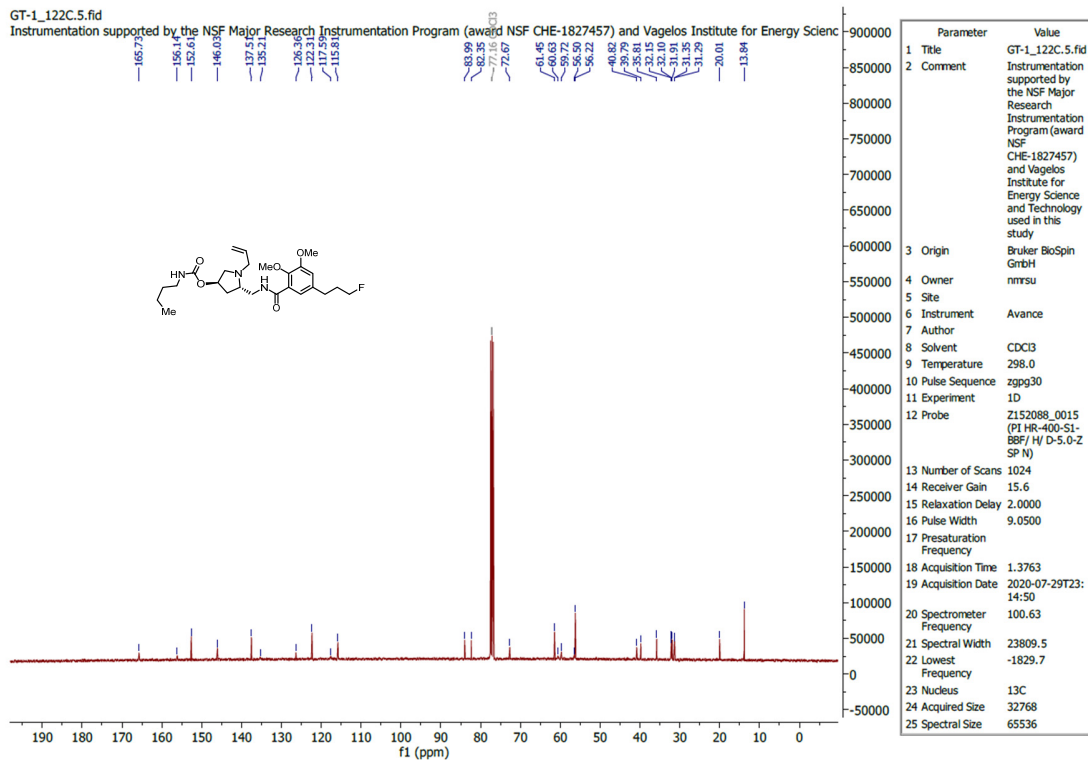

**(3*R*,5*S*)-1-allyl-5-((5-(3-fluoropropyl)-2,3-dimethoxybenzamido)methyl)pyrrolidin-3-yl hexylcarbamate ((*R,S*)-*trans*-**2b**). GT-6-122**

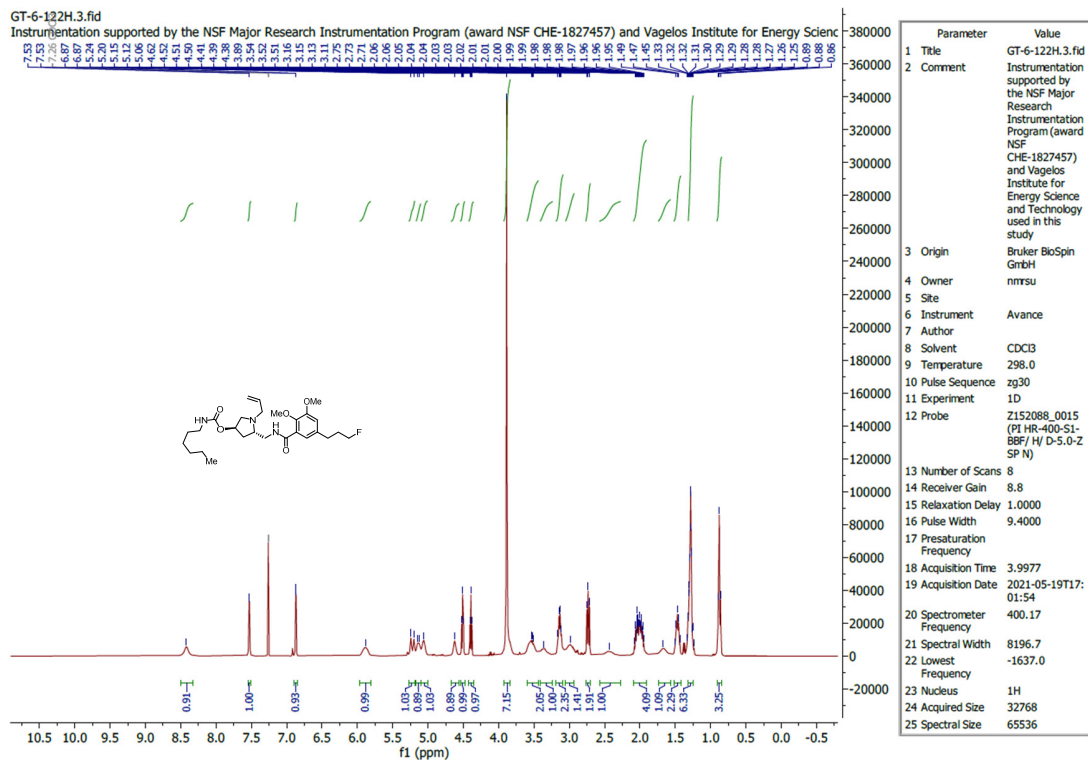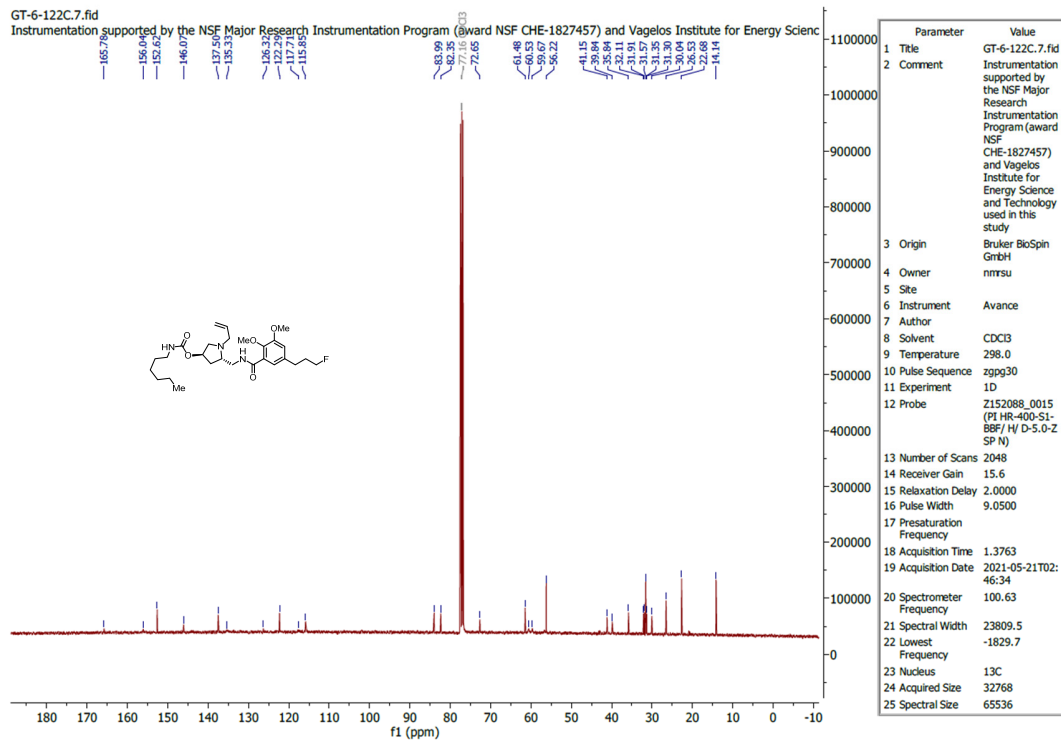

(3*R*,5*S*)-1-allyl-5-((5-(3-fluoropropyl)-2,3-dimethoxybenzamido)methyl)pyrrolidin-3-yl octylcarbamate  
(*R,S*)-**trans-2c**. GT-6-146

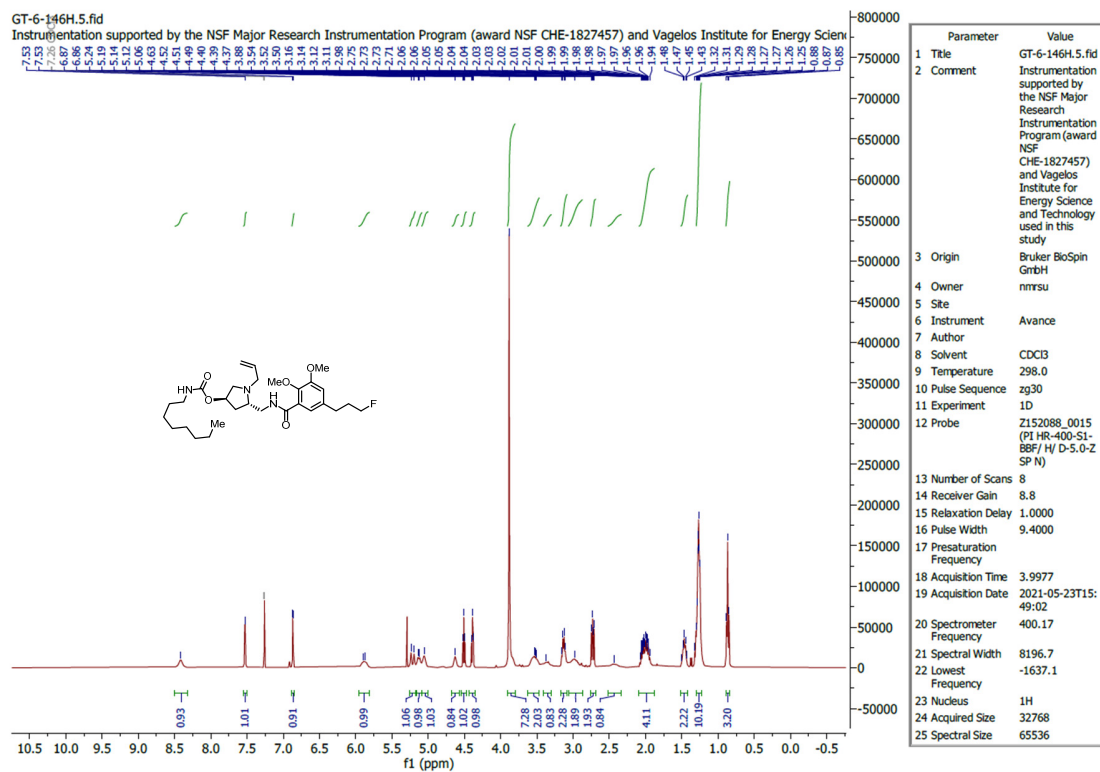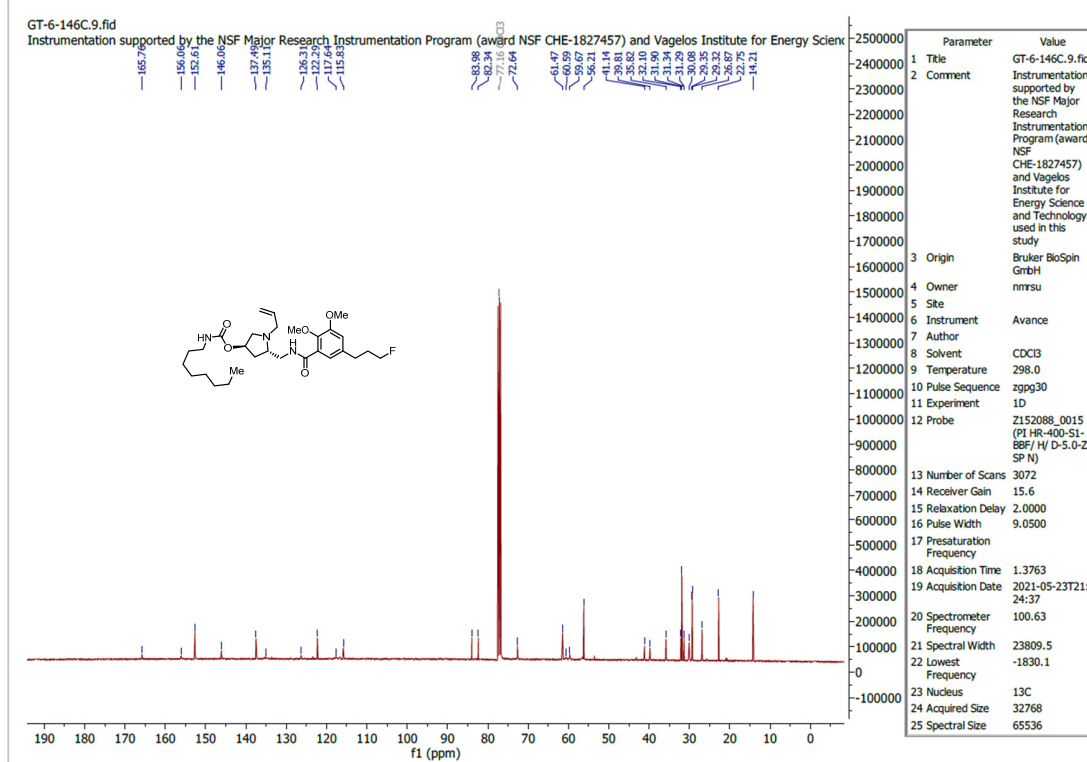

(3*R*,5*S*)-1-allyl-5-((5-(3-fluoropropyl)-2,3-dimethoxybenzamido)methyl)pyrrolidin-3-yl decylcarbamate  
**((*R*,*S*)-trans-2d)** GT-6-123 and (3*S*,5*R*)-1-allyl-5-((5-(3-fluoropropyl)-2,3-dimethoxybenzamido)methyl)pyrrolidin-3-yl decylcarbamate **((*S*,*R*)-trans-2d)**. GT-7-50

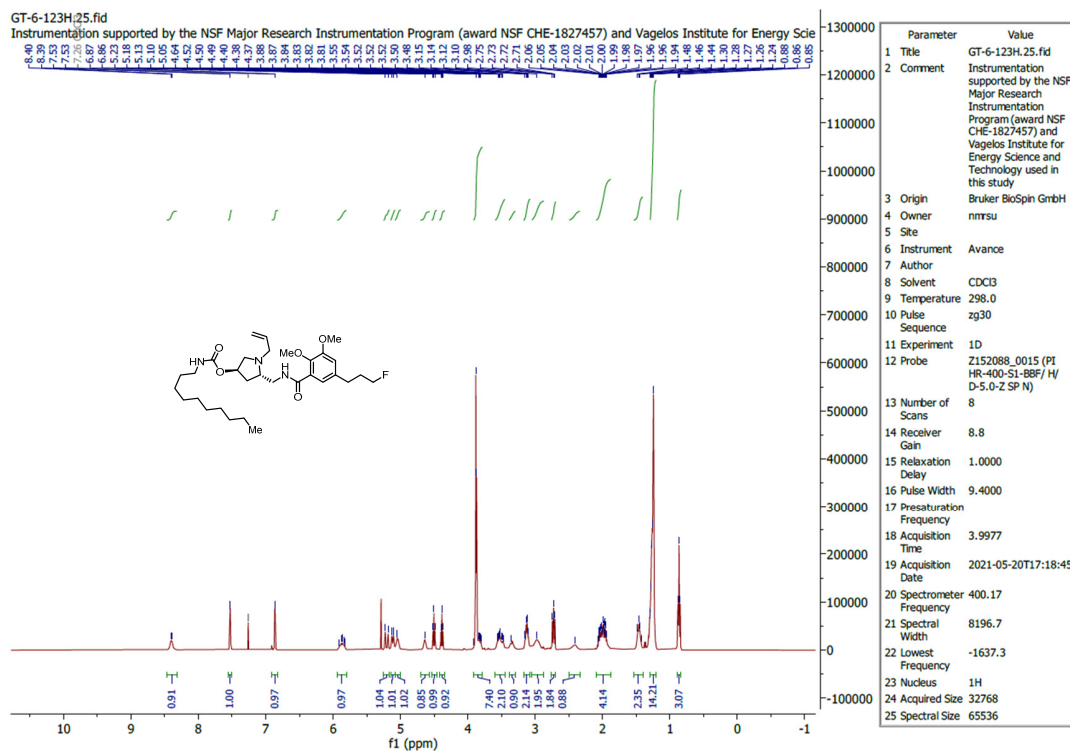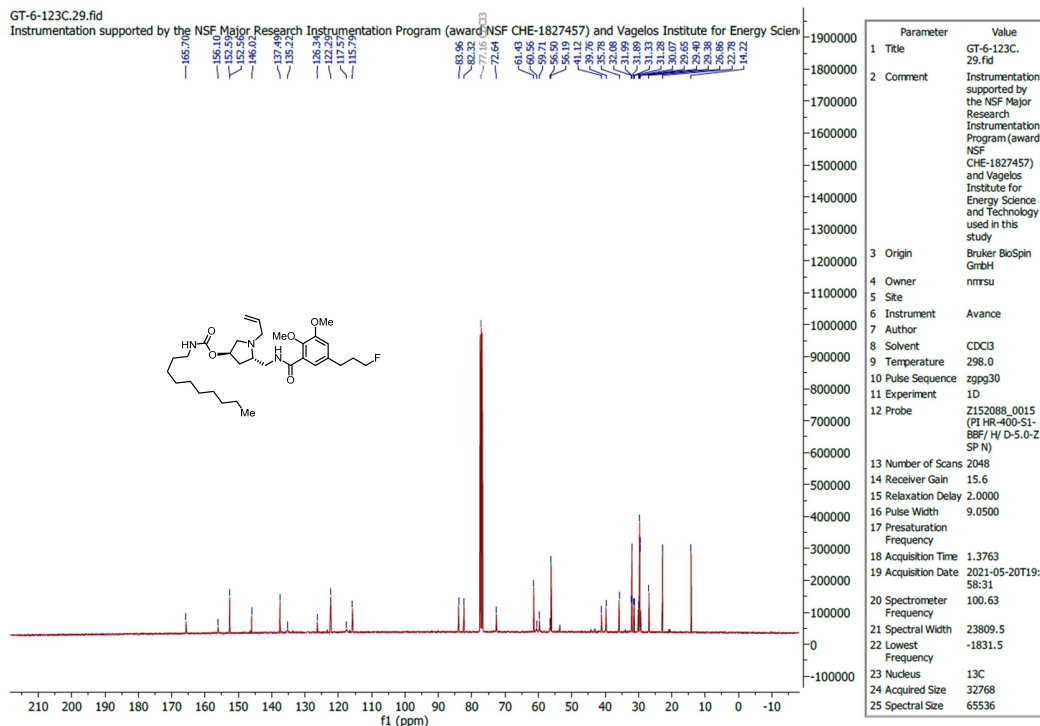

(3*R*,5*S*)-1-allyl-5-((5-(3-fluoropropyl)-2,3-dimethoxybenzamido)methyl)pyrrolidin-3-yl (2-(2-(2-methoxyethoxy)ethoxy)ethyl)carbamate ((*R,S*)-*trans*-2*e*). GT-6-147

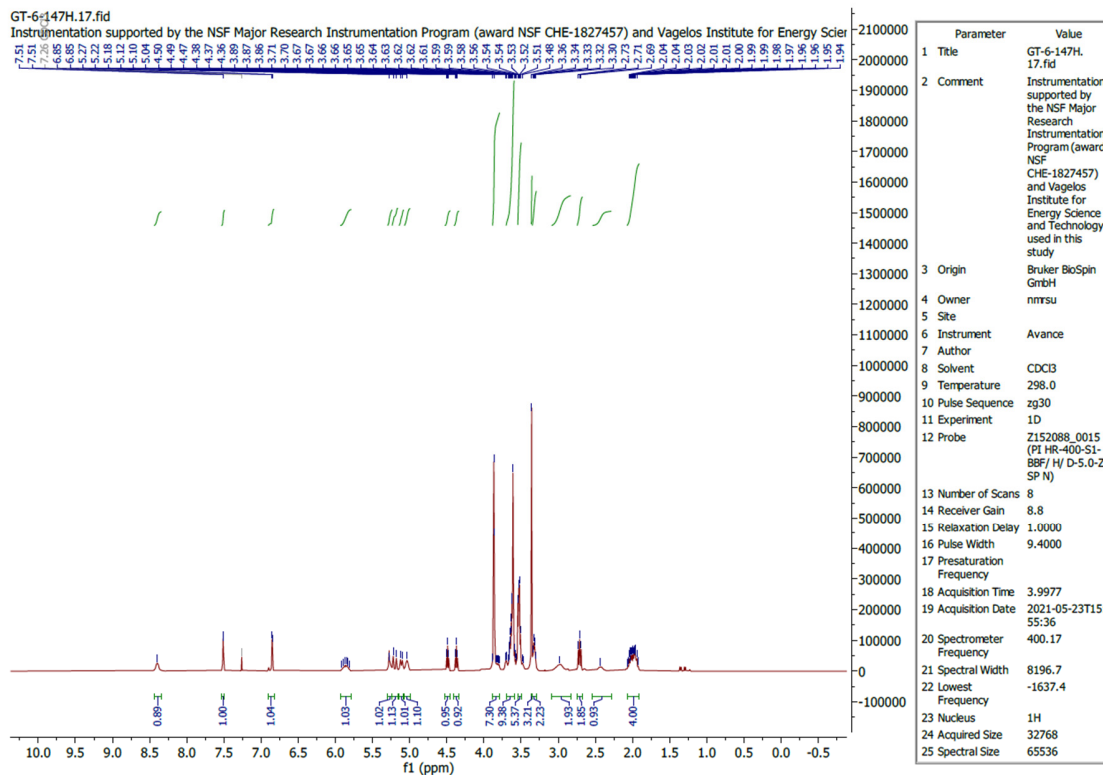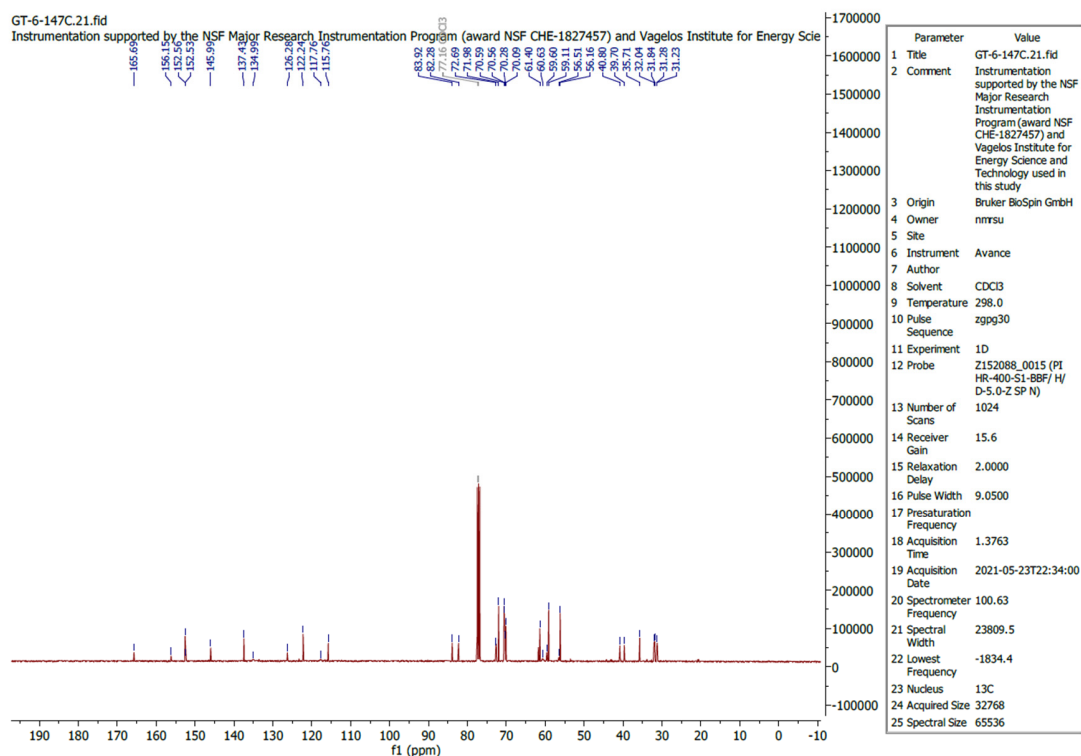

(3*R*,5*S*)-1-allyl-5-((5-(3-fluoropropyl)-2,3-dimethoxybenzamido)methyl)pyrrolidin-3-yl  
tetraoxatridecan-13-yl)carbamate ((*R,S*)-*trans*-2*f*). GT-6-142

(2,5,8,11-

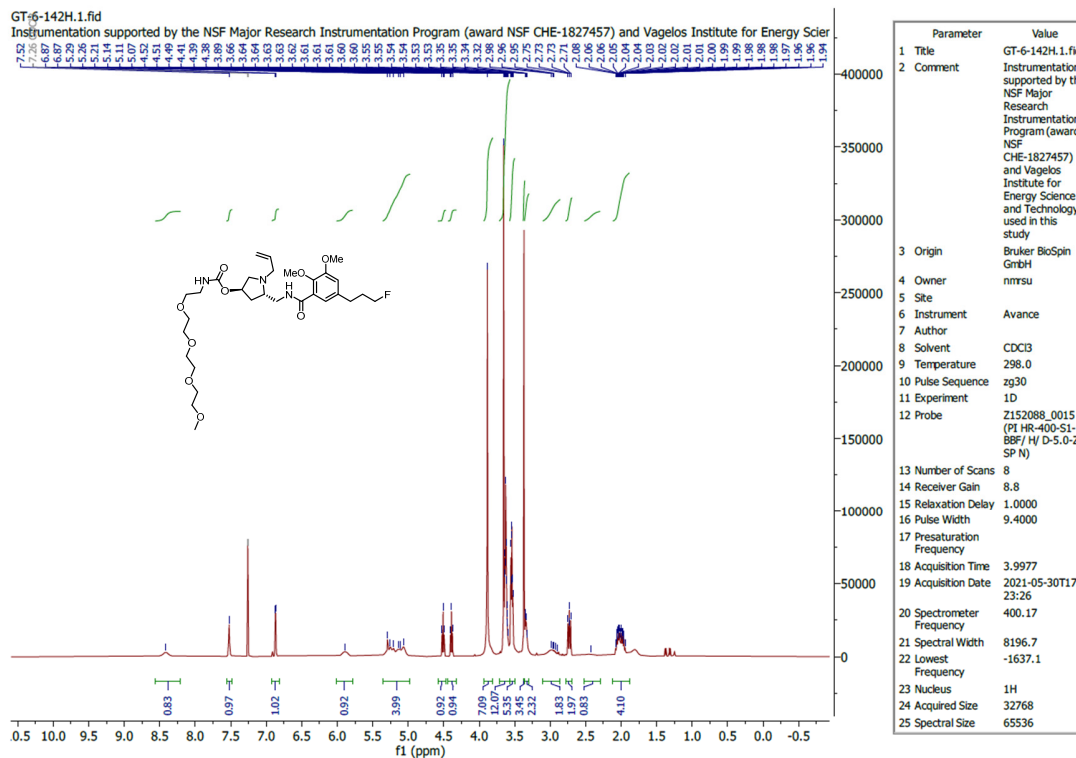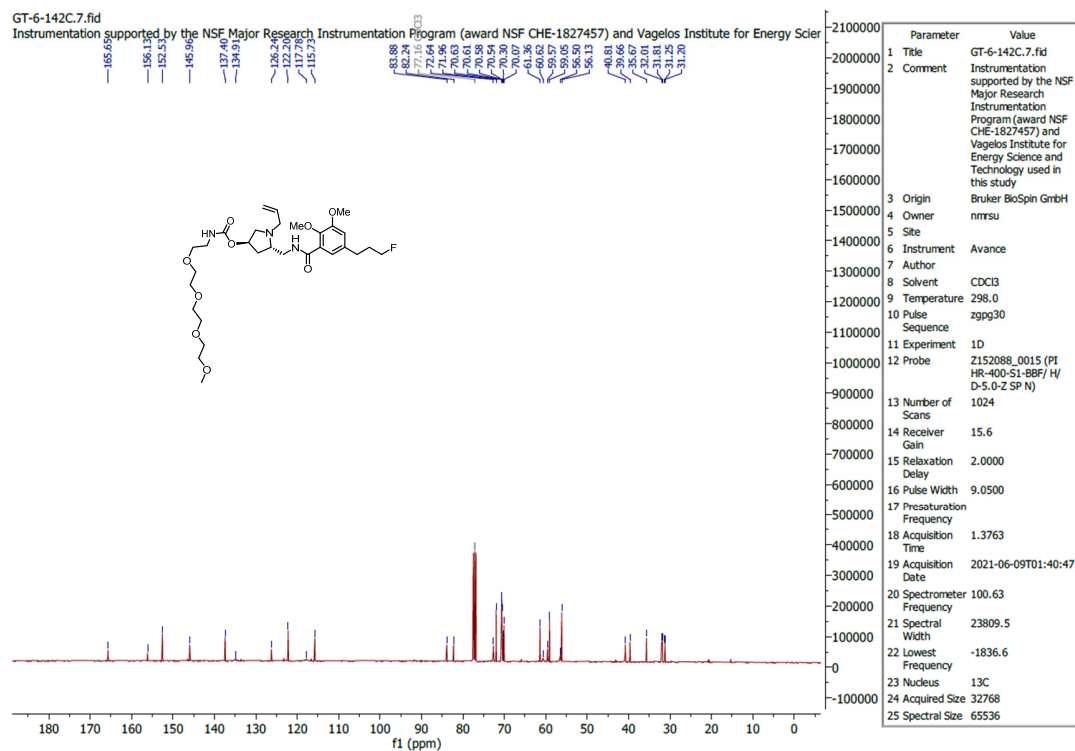



(3*R*,5*S*)-1-allyl-5-((5-(3-fluoropropyl)-2,3-dimethoxybenzamido)methyl)pyrrolidin-3-yl (2-(2-(prop-2-yn-1-yloxy)ethoxy)ethyl)carbamate ((*R,S*)-*trans*-2*g*). GT-6-148

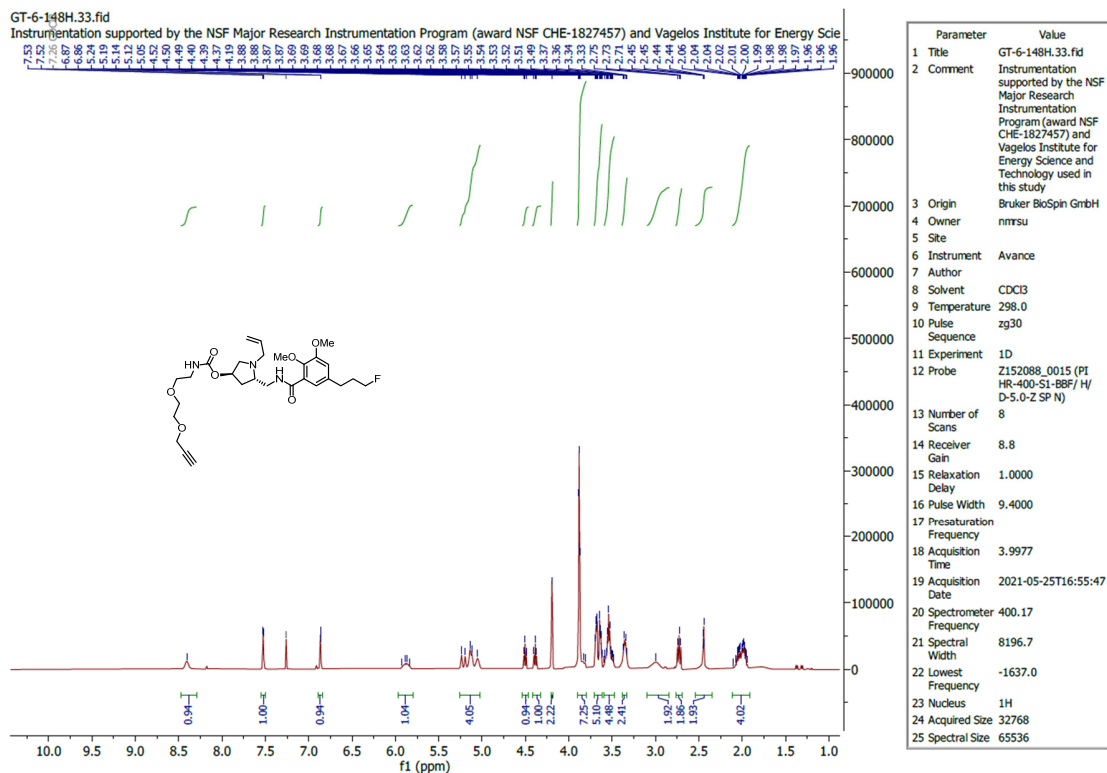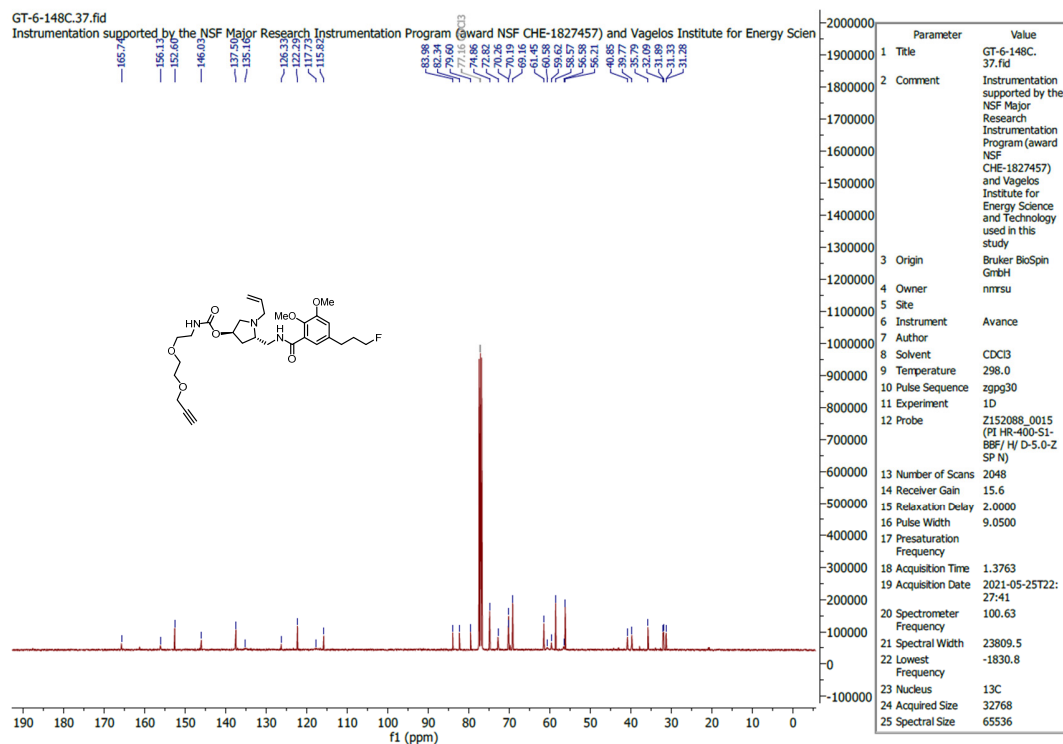

(3*R*,5*S*)-1-allyl-5-((5-(3-fluoropropyl)-2,3-dimethoxybenzamido)methyl)pyrrolidin-3-yl (6-(thiophen-2-yl)hexyl)carbamate (**(*R,S*)-trans-2h**) GT-7-6

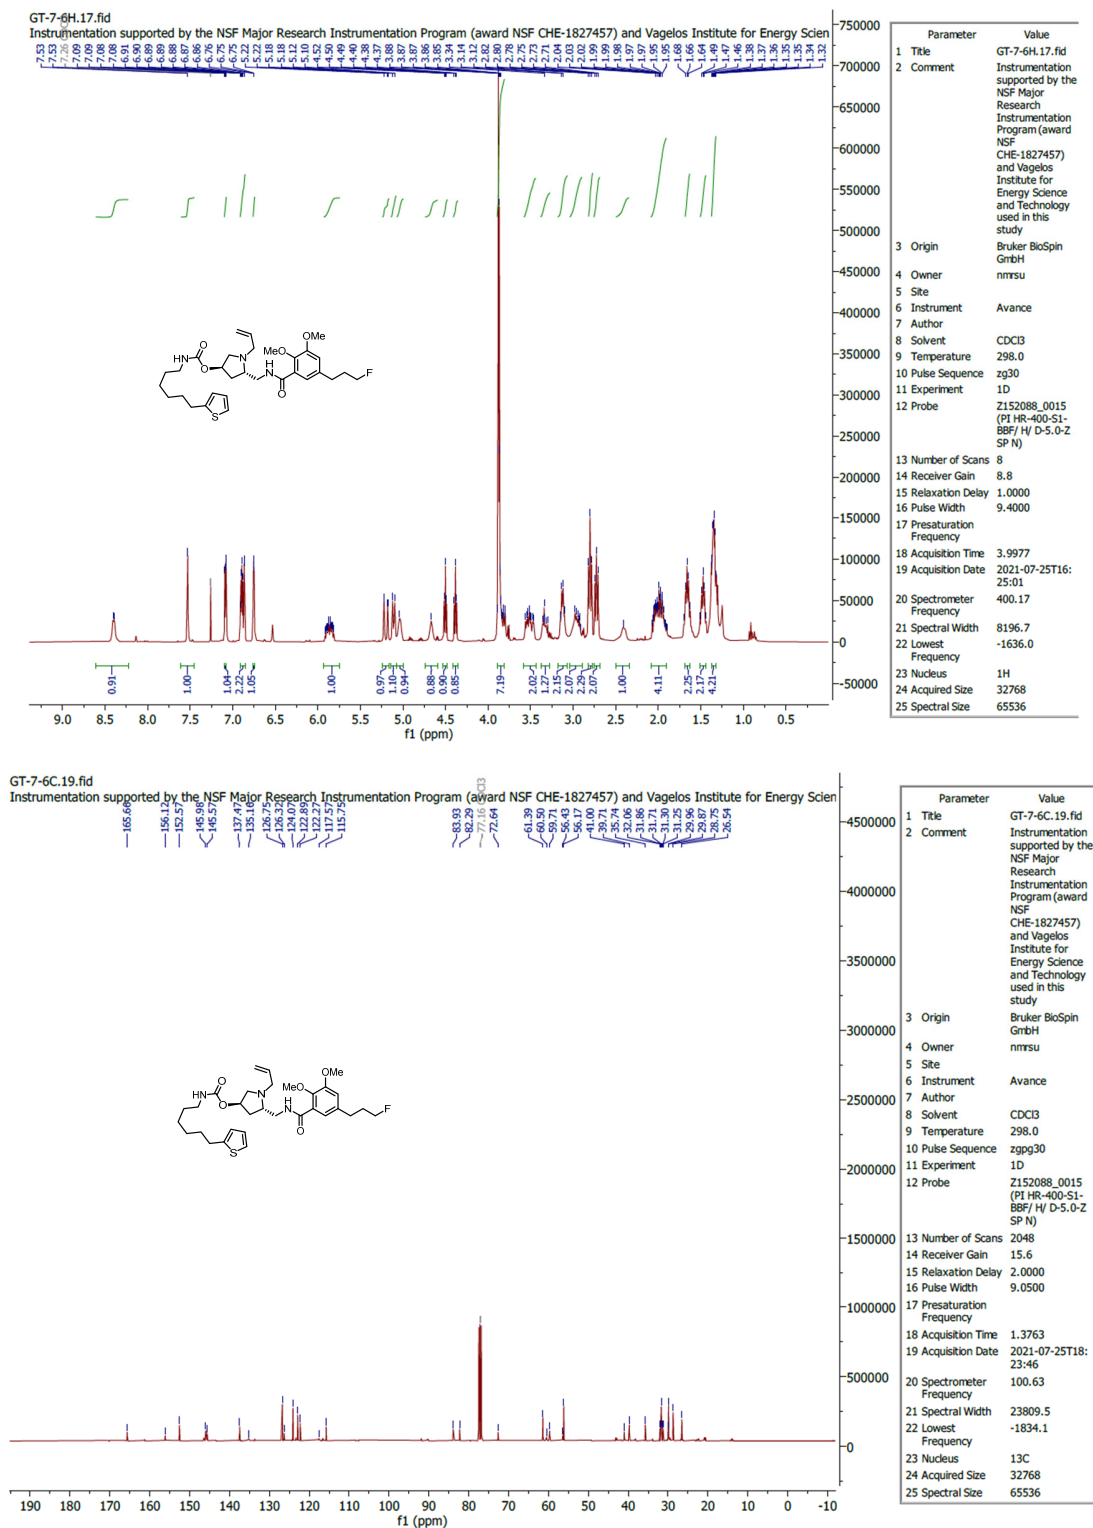



(3*R*,5*S*)-1-allyl-5-((5-(3-fluoropropyl)-2,3-dimethoxybenzamido)methyl)pyrrolidin-3-yl (8-(thiophen-2-yl)octyl)carbamate ((*R,S*)-*trans*-2i) GT-7-12 or (3*S*,5*R*)-1-allyl-5-((5-(3-fluoropropyl)-2,3-dimethoxybenzamido)methyl)pyrrolidin-3-yl (8-(thiophen-2-yl)octyl)carbamate ((*S,R*)-*trans*-2i). GT-7-51

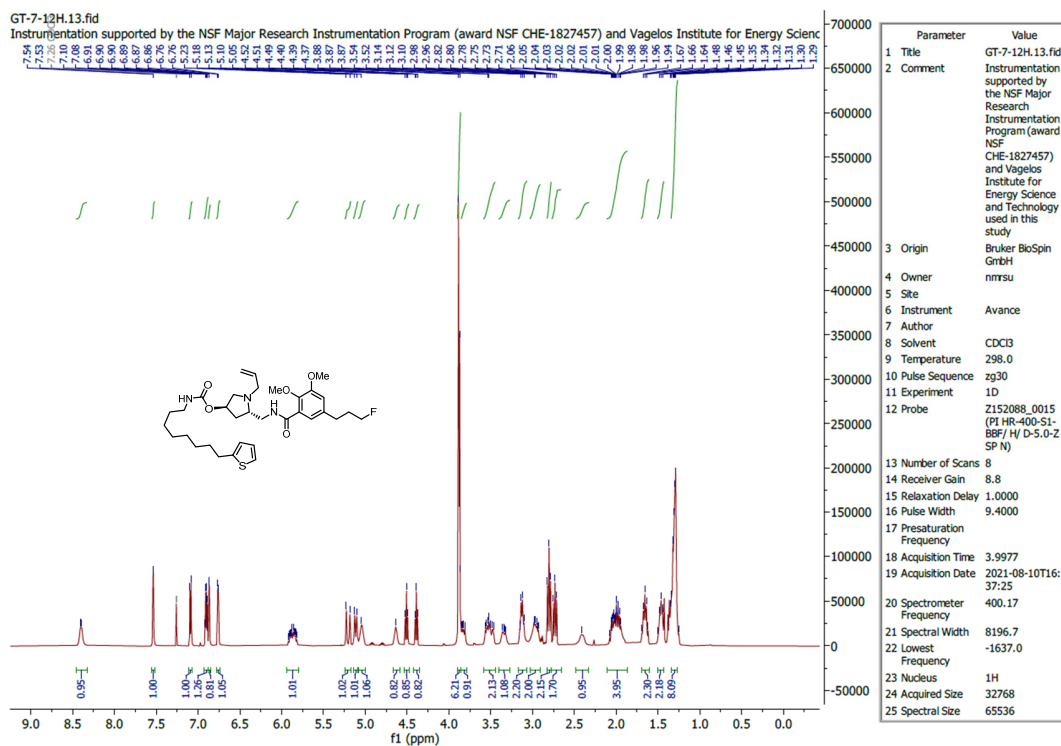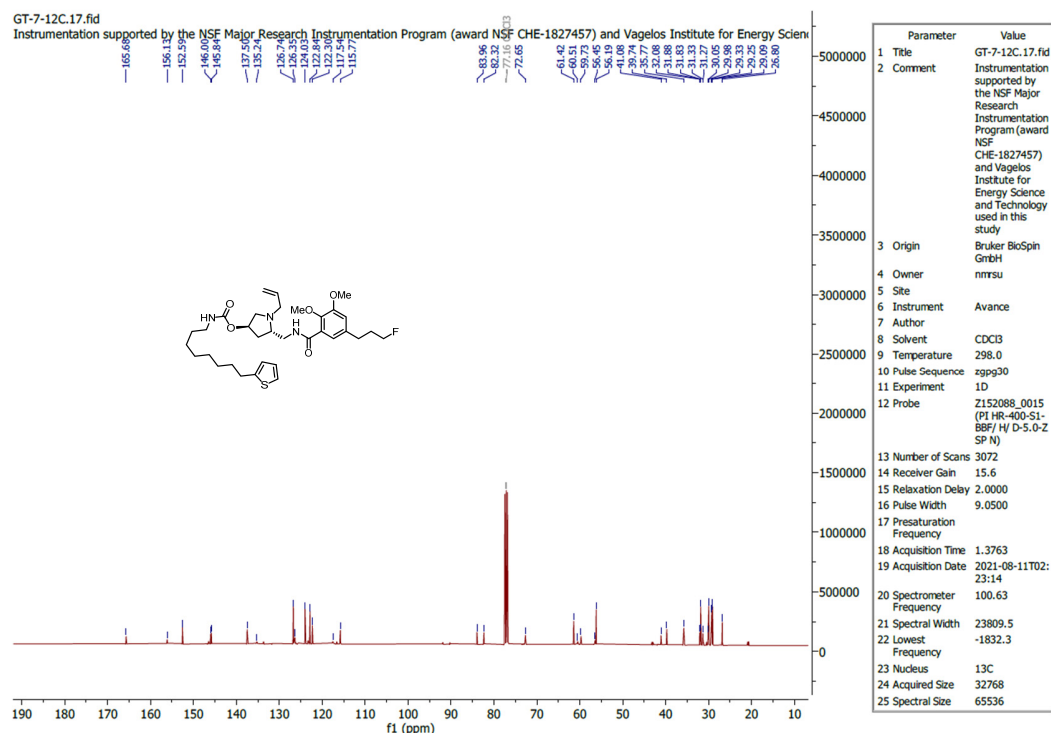

(8-(thiophen-3-

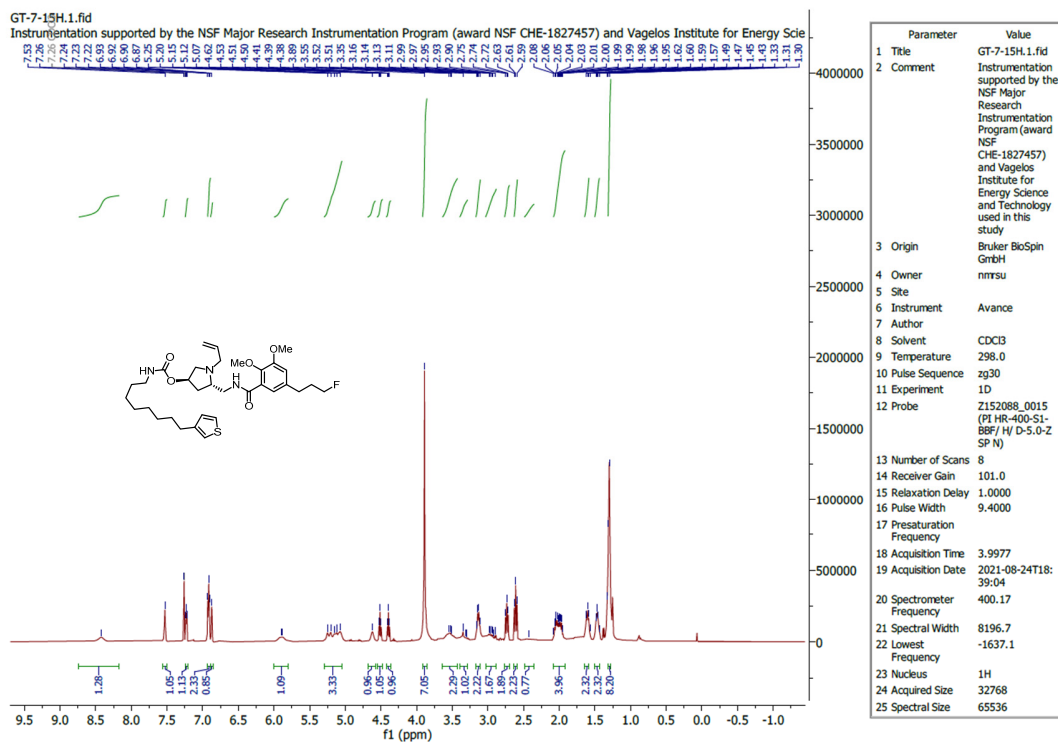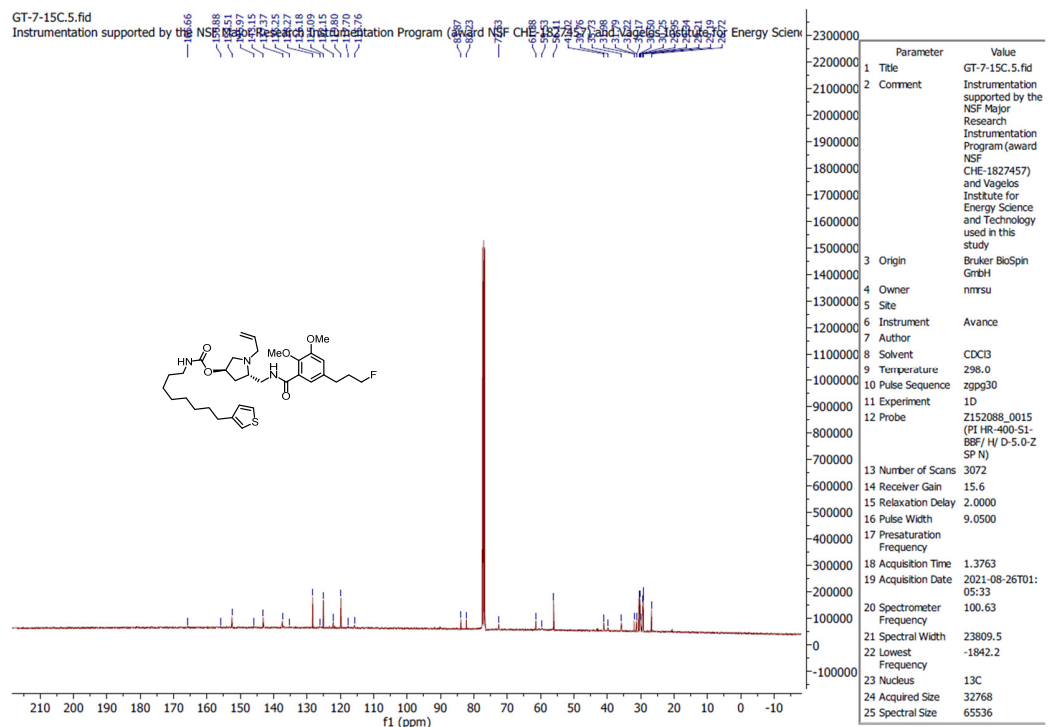

(3*S*,5*S*)-1-allyl-5-((5-(3-fluoropropyl)-2,3-dimethoxybenzamido)methyl)pyrrolidin-3-yl decylcarbamate ((*S*, *S*)-*cis*-**2d**) GT-7-52 and (3*R*,5*R*)-1-allyl-5-((5-(3-fluoropropyl)-2,3-dimethoxybenzamido)methyl)pyrrolidin-3-yl decylcarbamate ((*R*, *R*)-*cis*-**2d**). GT-7-54

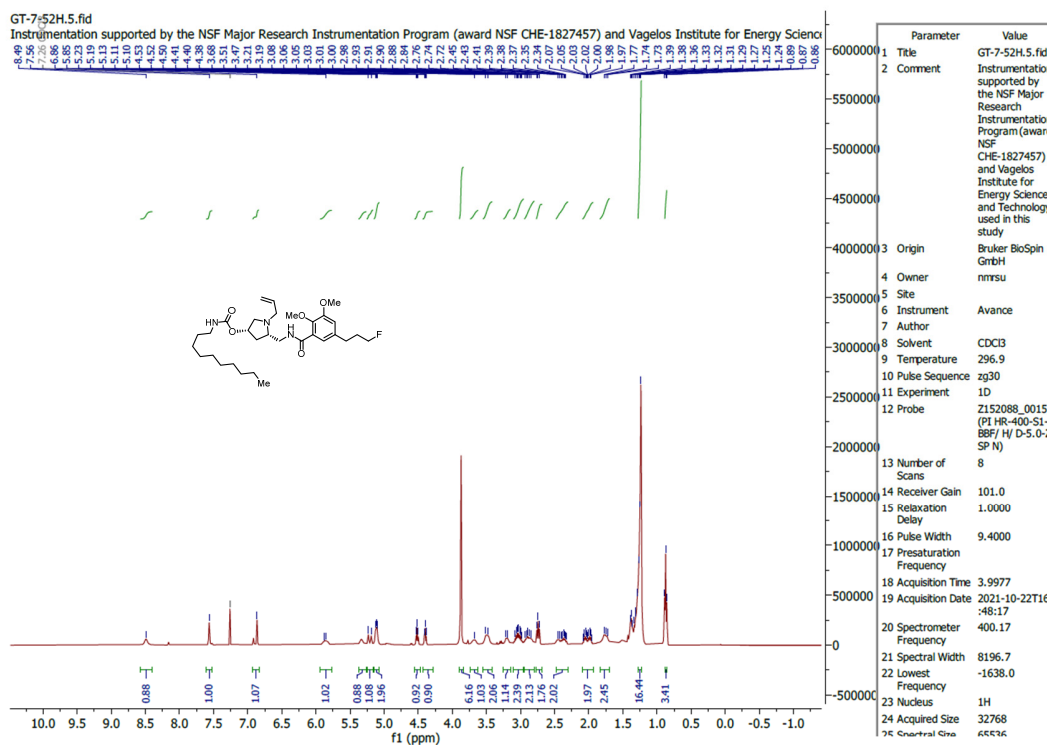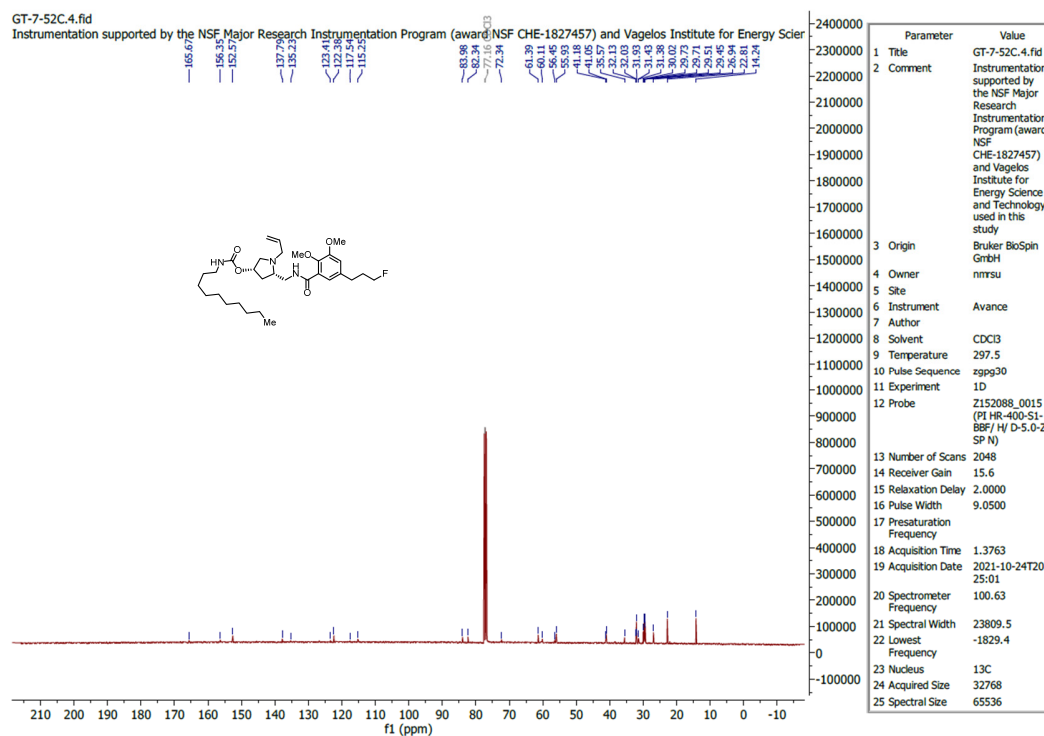

(3*S*,5*S*)-1-allyl-5-((5-(3-fluoropropyl)-2,3-dimethoxybenzamido)methyl)pyrrolidin-3-yl (8-(thiophen-2-yl)octyl)carbamate ((*S*, *S*)-*cis*-2*i*) GT-7-53 and (3*R*,5*R*)-1-allyl-5-((5-(3-fluoropropyl)-2,3-dimethoxybenzamido)methyl)pyrrolidin-3-yl (8-(thiophen-2-yl)octyl)carbamate ((*R*, *R*)-*cis*-2*i*). GT-7-55

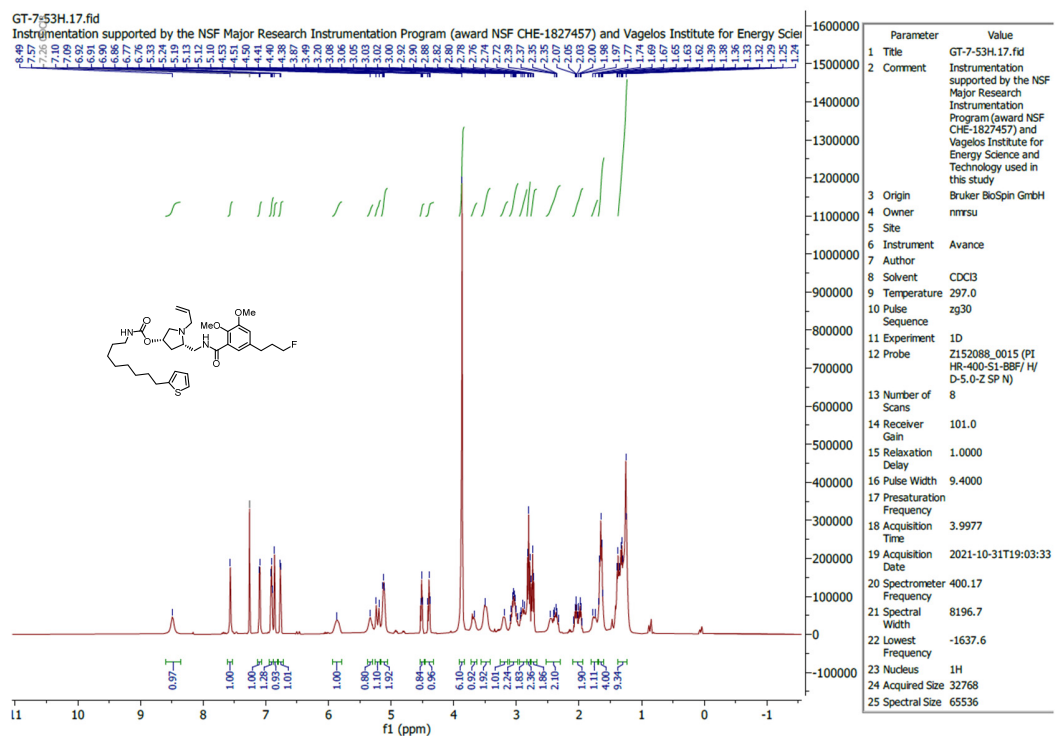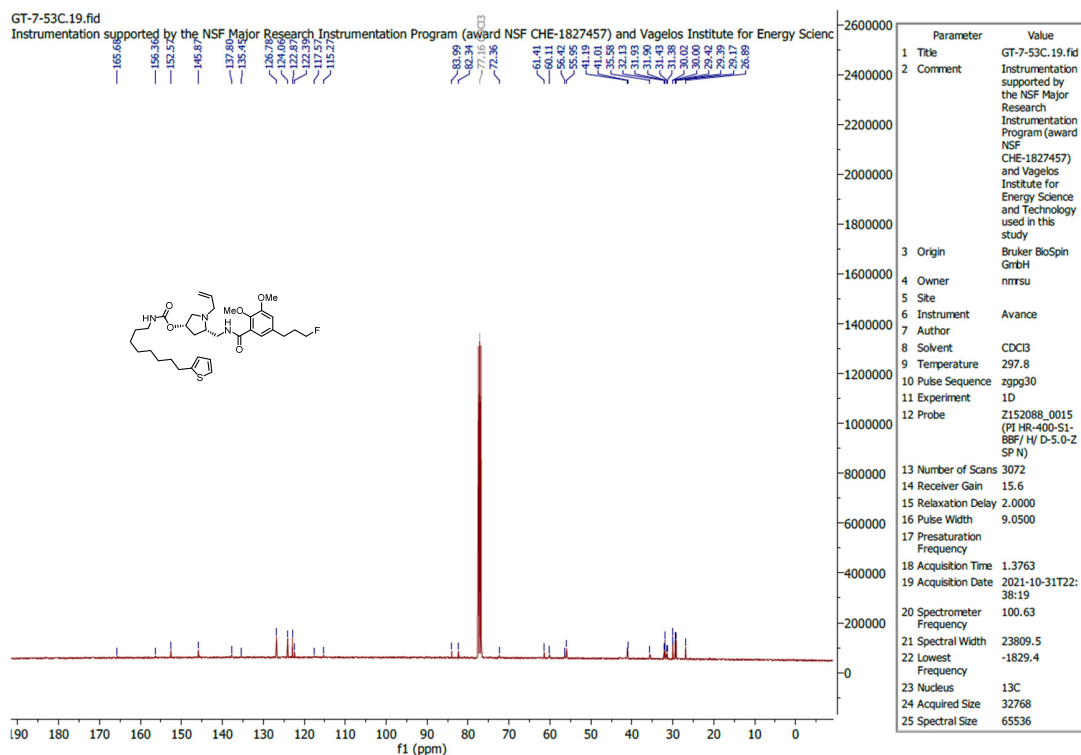

Supplement: s1 [file s1]
